# Supplementary material
Source: PubMed Central journal article supplement (PMC3918496)
Supplement: NIHMS545888-supplement-2_si_001.pdf [file NIHMS545888-supplement-2_si_001.pdf]

# Dynamic Measurements of Membrane Insertion Potential of Synthetic Cell Penetrating Peptides

## Supporting Information for Publication

### (Supplementary Figures)

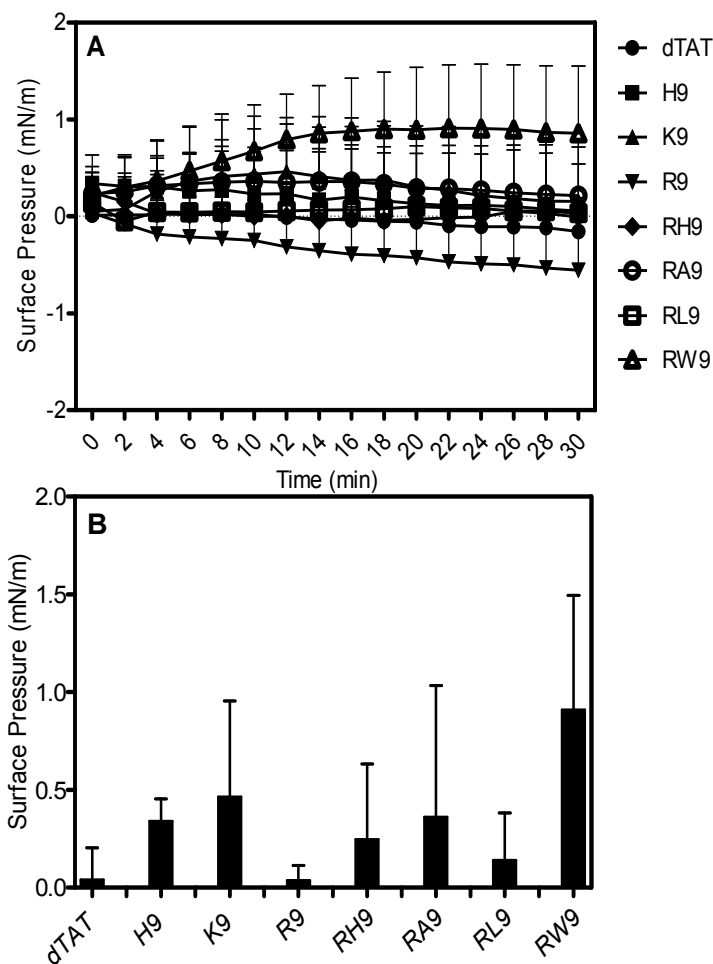

### Supplementary Figure 1

(A) Changes in the surface pressure vs. time following adsorption of the eight CPPs into a phospholipid-free interface. The peptides are at a final concentration of 10  $\mu$ M (B) Maximum change in the surface pressure (plateau values) recorded for the eight CPPs. The results are presented as mean  $\pm$  SD (n = 3).

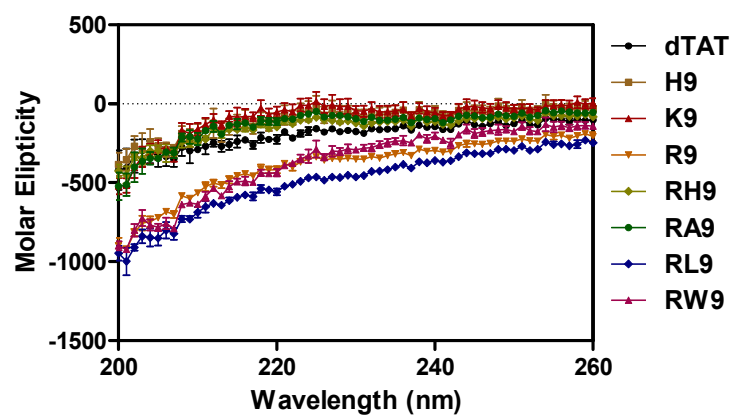

### Supplementary Figure 2

CD analysis of the eight CPPs. The peptide concentration used was 10  $\mu\text{M}$  using a 0.1 cm path length quartz cuvette was used with a total volume of 200  $\mu\text{L}$  (in PBS). Full CD spectra were collected at 22  $^{\circ}\text{C}$  for wavelengths ranging from 260 to 200 nm. CD spectra analysis of the eight CPPs showed that the eight CPPs in the PBS solution contain random-coil conformations. The results are presented as mean  $\pm$  SD ( $n = 3$ ). CD spectra were recorded using a Chirascan (Applied Photophysics) instrument.
